# Supplementary material for: Selective continuous flow extractive denitrogenation of oil containing S- and N-heteroaromatics using metal-containing ionic liquids supported on monolithic silica with hierarchical porosity
Source: Royal Society of Chemistry journal article supplement (doi:10.1039/c3ra43585g), 2013-10-28
Supplement: c3ra43585g.pdf [file c3ra43585g.pdf]

# Selective continuous flow removal of nitrogen impurities from oil containing S- and N-heteroaromatic compounds using metal-containing ionic liquids supported on monolithic silica with hierarchical porosity

Paulo Forte,<sup>a</sup> Alexander Sachse,<sup>b</sup> Michael Maes,<sup>a</sup> Anne Galarneau<sup>b</sup> and Dirk De Vos<sup>\*a</sup>

<sup>a</sup> Centre for Surface Chemistry and Catalysis, Katholieke Universiteit Leuven, Kasteelpark Arenberg 23, B-3001 Leuven (Belgium). Fax: (+32) 16 321998; Tel: (32) 16 321639; E-mail: dirk.devos@biw.kuleuven.be

<sup>b</sup> Institut Charles Gerhardt Montpellier, UMR 5253, CNRS-UM2-ENSCM-UM1, ENSCM, 8 rue de l'École Normale, 34296 Montpellier Cedex 5 (France).

## Electronic Supplementary information

### Synthesis of the bistriflimide metal salts.

*Synthesis of copper(II) bis(trifluoromethanesulfonyl)imide pentahydrate salt {Cu<sup>II</sup>(NTf<sub>2</sub>)<sub>2</sub>·5H<sub>2</sub>O}.*

Copper(II) oxide (CuO) was gradually added to an aqueous solution of bis(trifluoromethanesulfonyl)imidic acid. When no more copper salt was consumed, the remaining solid was filtered out and the water evaporated in a Schlenk setup under <10<sup>-3</sup> mbar to afford the copper(II) bistriflimide salt Cu(NTf<sub>2</sub>)<sub>2</sub>·5H<sub>2</sub>O in blue crystals. Literature procedure (Nie J. *et al.*, *Catalysis Today*, 1997 **36**(1) p. 81-84).

*Synthesis of copper(I) bis(trifluoromethanesulfonyl)imide salt (Cu<sup>I</sup>NTf<sub>2</sub>) in IL [BMIM][NTf<sub>2</sub>]*

Cu(II)(NTf<sub>2</sub>)<sub>2</sub>·5H<sub>2</sub>O (140 mg, 0.196 mmol) was transferred under N<sub>2</sub> atmosphere to a round-bottomed flask. Dry [BMIM][NTf<sub>2</sub>] (10 ml) was added and salt was dissolved at 90 °C and under vacuum. The solution presented a pale green colour. Metallic copper (12.46 mg, 0.196 mmol) was added and the mixture was stirred at 90 °C overnight under vacuum. After this period, the copper source in contact with the solution presented signs of corrosion and the solution presented a light-brown colour. The mass measurement of the copper source before and after the reaction confirms a 90% symproportionation reaction completion.

*Synthesis of zinc(II) bis(trifluoromethanesulfonyl)imide {Zn<sup>II</sup>(NTf<sub>2</sub>)<sub>2</sub>}.*

Zinc(II) oxide was added to a solution of bis(trifluoromethanesulfonyl)imidic acid in deionized water. When no more oxide was consumed, the remaining solid was filtrated out. The water was evaporated in a schlenk setup under <10<sup>-3</sup> mbar and the resulting off-white powder was dried under vacuum at 100 °C. Literature procedure (Nie J., *et al.*, *Catalysis Today*, 1997 **36**(1) p. 81-84).

*Synthesis of iron(II) bis(trifluoromethanesulfonyl)imide salt {Fe<sup>II</sup>(NTf<sub>2</sub>)<sub>2</sub>}.*

Metallic iron (1 g, 17.91 mmol) was suspended in water (Volume: 5 ml) under N<sub>2</sub> atmosphere. The bis(trifluoromethanesulfonyl)imidic acid (12.59 g, 35.8 mmol) was added, dropwise. The colourless, clear solution was stirred for a few minutes at 80 °C. The solvent was removed under 10<sup>-3</sup> mbar

reduced pressure in a Shlenk setup pressure, resulting in a white powder. Literature procedure (Yamagata, M., et al., *Electrochimica Acta*, 2007. **52**(9): p. 3317-3322).

### Synthesis of the [MCl<sub>x</sub>]-type ionic liquids:

#### *Synthesis of 1-Butyl-3-methylimidazolium copper(I) dichloride [BMIM][Cu<sup>I</sup>Cl<sub>2</sub>] ionic liquid.*

[BMIM][Cl] (4 g, 22.90 mmol) and copper(I) chloride (2.27 g, 22.93 mmol) were mixed, under N<sub>2</sub> atmosphere. The solid-state mixture was stirred under vacuum at room temperature until complete dissolution of the components. After all the residual water was evaporated, the liquid obtained presented a brown colour. Literature reaction (Bolkan, S.A. and J.T. Yoke, *J Chem Eng Data*, 1986 **31**(2): p. 194-197).

#### *Synthesis of bis(1-Butyl-3-methylimidazolium) copper(II) tetrachloride [BMIM]<sub>2</sub>[Cu<sup>II</sup>Cl<sub>4</sub>] ionic liquid.*

Copper(II) chloride (1.328 g, 9.88 mmol) and [BMIM][Cl] (3.45 g, 19.75 mmol) were mixed, under N<sub>2</sub> atmosphere. The solid-state mixture was stirred under vacuum at 80 °C until complete dissolution of the components. After all the residual water was evaporated, the liquid obtained presented a brownish-red colour. Literature reaction (Sasaki, T., et al., *Chem Commun*, **2005**(19) p. 2506-2508).

#### *Synthesis of bis(1-Butyl-3-methylimidazolium) zinc(II) tetrachloride [BMIM]<sub>2</sub>[Zn<sup>II</sup>Cl<sub>4</sub>] ionic liquid.*

Zinc chloride (3.12 g, 22.90 mmol) and [BMIM][Cl] (4 g, 22.90 mmol) were mixed, under N<sub>2</sub> atmosphere. The solid-state mixture was stirred under vacuum at room temperature until complete dissolution of the components. After all the residual water was evaporated, the liquid obtained presented a light yellow colour. Literature reaction (Seddon, K.R., et al., *Inorg Chem*, 2011 **50**(11) p. 5258-5271).

#### *Synthesis of 1-Butyl-3-methylimidazolium iron(II) tetrachloride [BMIM][Fe<sup>II</sup>Cl<sub>4</sub>] ionic liquid.*

[BMIM][Cl] (0.993 g, 5.68 mmol) and iron(II) chloride tetrahydrate (1.130 g, 5.68 mmol) were mixed, under N<sub>2</sub> atmosphere. The solid-state mixture was stirred under vacuum at room temperature until complete dissolution of the components. After all the residual water was evaporated, the liquid obtained presented a brown colour. Literature reaction (Sitze, M.S., et al., *Inorganic Chemistry*, 2001 **40**(10) p. 2298-2304.)

#### *Synthesis of 1-Butyl-3-methylimidazolium iron(III) tetrachloride [BMIM][Fe<sup>III</sup>Cl<sub>4</sub>] ionic liquid.*

[BMIM][Cl] (0.993 g, 5.68 mmol) and iron(III) trichloride (0.924 g, 5.70 mmol) were mixed, under N<sub>2</sub> atmosphere. The solid-state mixture was stirred under vacuum at room temperature until complete dissolution of the components. After all the residual water was evaporated, the liquid obtained presented a brown colour. Literature reaction (Sitze, M.S., et al., *Inorganic Chemistry*, 2001 **40**(10) p. 2298-2304.)
